# Supplementary material for: Effects of SARS-COV-2 infection on outcomes in patients hospitalized for acute cardiac conditions. A prospective, multicenter cohort study (Swiss Cardiovascular SARS-CoV-2 Consortium)
Source: PubMed Central journal article supplement (PMC10613056; doi:10.3389/fcvm.2023.1203427), 2023-10-13
Supplement: Datasheet1.pdf [file Datasheet1.pdf]

## *Supplementary Material*

### **Effects of SARS-COV-2 infection on outcomes in patients hospitalized for acute cardiac conditions. A prospective, multicenter cohort study**

**Swiss Cardiovascular SARS-CoV-2 Consortium**

**Konstantinos C Koskinas<sup>1</sup>, Raphael Twerenbold<sup>2,3,4</sup>, David Carballo<sup>5</sup>, Christian M Matter<sup>6</sup>, Stephane Cook<sup>7</sup>, Dik Heg<sup>8</sup>, Andre Frenk<sup>1</sup>, Stephan Windecker<sup>1</sup>, Stefan Osswald<sup>2</sup>, Thomas F Lüscher<sup>9,10</sup>, Francois Mach<sup>5</sup>**

<sup>1</sup>Bern University Hospital Inselspital, Bern, Switzerland

<sup>2</sup>Basel University Hospital, Basel, Switzerland

<sup>3</sup>University Center of Cardiovascular Science & Department of Cardiology, University Heart and Vascular Center Hamburg, University Medical Center Hamburg-Eppendorf, Hamburg, Germany

<sup>4</sup>German Center for Cardiovascular Research (DZHK) Partner Site Hamburg–Kiel–Lübeck, Germany

<sup>5</sup>Geneva University Hospitals, Geneva, Switzerland

<sup>6</sup>Zurich University Hospital, Zurich, Switzerland

<sup>7</sup>Fribourg Canton Hospital, Fribourg, Switzerland

<sup>8</sup>CTU Bern, University of Bern, Bern, Switzerland.

<sup>9</sup>Royal Brompton & Harefield Hospitals and National Heart and Lung Institute, Imperial College, London, UK.

<sup>10</sup>Center for Molecular Cardiology, University of Zurich, Zurich, Switzerland.

**\* Correspondence:**

Konstantinos Koskinas, MD

Department of Cardiology

Bern University Hospital – Inselspital

Freiburgstrasse 18

CH-3010 Bern

Mail: [konstantinos.koskinas@insel.ch](mailto:konstantinos.koskinas@insel.ch)

## Supplemental Figures

**Supplemental Figure 1.** All-cause death within 30 days (**A**) and within 1 year (**B**) in the matched cohort (n=186)

**A**

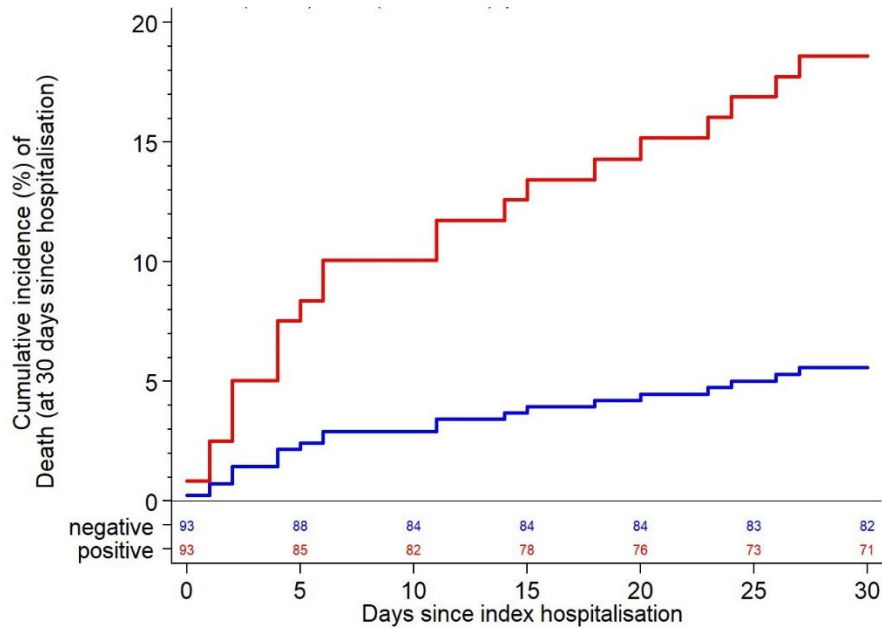

**B**

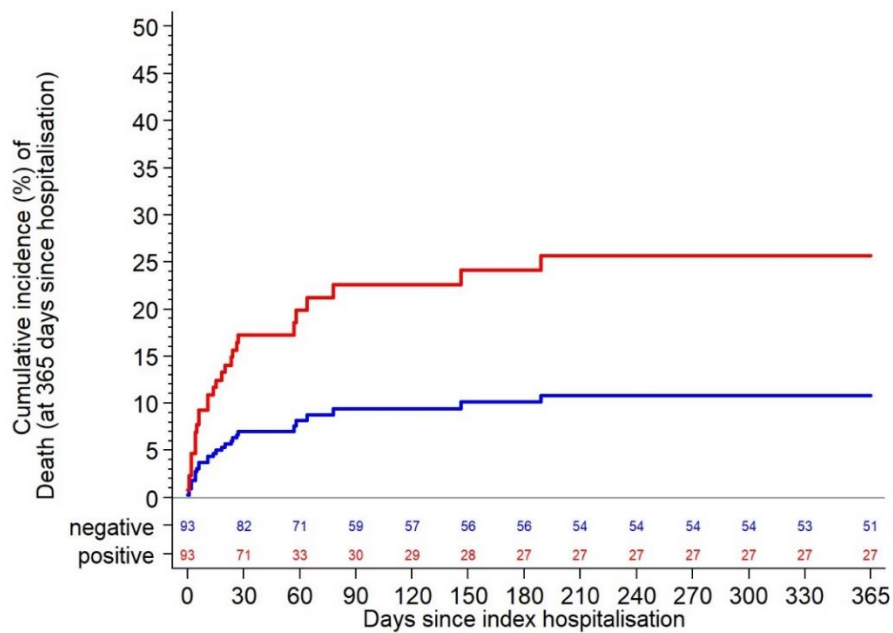

## Supplemental Tables

**Supplemental Table 1. Time interval between symptom onset, hospital arrival, and coronary intervention in the subgroup of patient with STEMI**

|                                              | All patients with STEMI<br>N=103 | Controls<br>N=95     | Cases<br>N=8          | p Value |
|----------------------------------------------|----------------------------------|----------------------|-----------------------|---------|
| Time of symptom onset $\leq$ 24 hours        | 82 of 103 (80%)                  | 76 of 95 (80%)       | 6 of 8 (75%)          | 0.66    |
| Symptom onset to hospital arrival time (min) | 166.0 (70.0; 576.0)              | 160.0 (71.8; 556.2)  | 245.0 (80.0; 1043.2)  | 0.43    |
| Symptom onset to catheter lab time (min)     | 189.0 (103.5; 624.5)             | 180.0 (104.0; 647.0) | 292.0 (69.0; 1389.0)  | 0.91    |
| Symptom onset to balloon/stenting time (min) | 209.0 (122.0; 672.2)             | 201.5 (122.2; 656.0) | 356.5 (122.0; 1509.8) | 0.42    |
|                                              |                                  |                      |                       |         |
| Time of symptom onset $>$ 24 hours           | 21 of 103 (20%)                  | 19 of 95 (20%)       | 2 of 8 (25%)          | 0.66    |
| >24-48 hours                                 | 12 (57%)                         | 11 (58%)             | 1 (50%)               | 1.00    |
| >48-72 hours                                 | 3 (14%)                          | 3 (16%)              | 0 (0%)                | 1.00    |
| >72 hours - 7 days                           | 2 (10%)                          | 2 (11%)              | 0 (0%)                | 1.00    |
| >7 days                                      | 4 (19%)                          | 3 (16%)              | 1 (50%)               | 0.35    |

Depicted are medians (25%; 75% quartiles) and counts with percentages of patients with non-missing data (%). P-values from t-tests, Mann-Whitney U-tests or Fisher's tests (or chi square tests in case more than 2 x 2 comparisons).

**Supplemental Table 2. Baseline patient characteristics in the matched cohort (n=186)**

|                                                           | All patients<br>N=186 | Controls<br>n=93 | Cases<br>N=93 | Difference (95% CI) | p Value |
|-----------------------------------------------------------|-----------------------|------------------|---------------|---------------------|---------|
| Age (years)                                               | 67.9 ± 15.0           | 68.6 ± 14.7      | 67.3 ± 15.3   | 1.3 (-3.0; 5.6)     | 0.555   |
| Male gender                                               | 145 (78%)             | 70 (75%)         | 75 (81%)      | -5% (-17%; 7%)      | 0.480   |
| Diagnosis at index hospitalization                        |                       |                  |               |                     | 0.987   |
| Acute coronary syndrome                                   | 61 (33%)              | 29 (31%)         | 32 (34%)      | -3% (-17%; 0%)      | 0.755   |
| New-onset major arrhythmia                                | 50 (27%)              | 25 (27%)         | 25 (27%)      | 0%                  | 1.000   |
| Acute heart failure                                       | 58 (31%)              | 31 (33%)         | 27 (29%)      | 4% (-9%; 18%)       | 0.635   |
| Severe symptomatic aortic stenosis                        | 10 (5%)               | 5 (5%)           | 5 (5%)        | 0%                  | 1.000   |
| Hospitalization related to adult congenital heart disease | 2 (1%)                | 1 (1%)           | 1 (1%)        | 0%                  | 1.000   |
| Clinically suspected myocarditis                          | 5 (3%)                | 2 (2%)           | 3 (3%)        | -1% (-6%; 4%)       | 1.000   |
| Diabetes mellitus                                         | 73 (39%)              | 37 (40%)         | 36 (39%)      | 1% (-13%; 15%)      | 1.0     |
| Current smoker                                            | 78 (42%)              | 35 (38%)         | 43 (46%)      | -9% (-23%; 6%)      | 0.298   |
| Hypercholesterolemia                                      | 86 (46%)              | 41 (44%)         | 45 (48%)      | -4% (-19%; 10%)     | 0.659   |
| Previous myocardial infarction                            | 48 (26%)              | 27 (29%)         | 21 (23%)      | 6% (-6%; 19%)       | 0.402   |
| History of malignancy                                     | 28 (15%)              | 19 (20%)         | 9 (10%)       | 11% (0%; 21%)       | 0.064   |
| Chronic obstructive lung disease                          | 18 (10%)              | 10 (11%)         | 8 (9%)        | 2% (-6%; 11%)       | 0.805   |
| Clinically relevant valvular disease                      | 18 (10%)              | 10 (11%)         | 8 (9%)        | 2% (-6%; 11%)       | 0.805   |
| Type of aortic valvular disease                           | n = 16                | n = 10           | n = 6         |                     | 0.726   |
| Severe native aortic valve stenosis                       | 10 (63%)              | 7 (70%)          | 3 (50%)       | 20% (-32%; 72%)     | 0.607   |
| Degenerated aortic bioprosthesis                          | 2 (13%)               | 1 (10%)          | 1 (17%)       | -7% (-43%; 29%)     | 1.000   |
| Severe aortic regurgitation                               | 4 (25%)               | 2 (20%)          | 2 (33%)       | -13% (-60%; 33%)    | 0.604   |
| NYHA class                                                | n = 175               | n = 92           | n = 83        |                     | 0.006   |
| NYHA I                                                    | 59 (34%)              | 40 (43%)         | 19 (23%)      | 21% (7%; 34%)       | 0.006   |
| NYHA II                                                   | 32 (18%)              | 15 (16%)         | 17 (20%)      | -4% (-16%; 7%)      | 0.558   |
| NYHA III                                                  | 35 (20%)              | 20 (22%)         | 15 (18%)      | 4% (-8%; 16%)       | 0.575   |
| NYHA IV                                                   | 49 (28%)              | 17 (18%)         | 32 (39%)      | -20% (-33%; -7%)    | 0.004   |
| Cardiogenic shock (Killip 4)                              | 18 (10%)              | 8 (9%)           | 10 (11%)      | -2% (-11%; 6%)      | 0.805   |
| Fever                                                     | 33 (18%)              | 13 (14%)         | 20 (22%)      | -8% (-20%; 3%)      | 0.178   |

|                                                     |          |          |          |                |       |
|-----------------------------------------------------|----------|----------|----------|----------------|-------|
| Intervention performed during index hospitalization |          |          |          |                |       |
| Coronary procedure                                  | 54 (29%) | 33 (35%) | 21 (23%) | 13% (-0%; 26%) | 0.075 |
| TAVI                                                | 7 (4%)   | 5 (5%)   | 2 (2%)   | 3% (-2%; 9%)   | 0.444 |
| Intervention for major arrhythmia                   | 23 (12%) | 13 (14%) | 10 (11%) | 3% (-6%; 13%)  | 0.657 |
| Patient transfer to Intensive Care Unit             | 65 (35%) | 33 (35%) | 32 (34%) | 1% (-13%; 15%) | 1.000 |

**Supplemental Table 3. Baseline characteristics of enrolled patients excluding patients with severe aortic stenosis**

|                                                           | All patients<br>N = 459 | Controls<br>N = 342 | Cases<br>N = 117 | Difference (95% CI) | p Value |
|-----------------------------------------------------------|-------------------------|---------------------|------------------|---------------------|---------|
| Age (years)                                               | 66.2 ± 14.9             | 65.7 ± 14.9         | 67.6 ± 14.8      | -1.8 (-5.0; 1.3)    | 0.25    |
| Male sex                                                  | 352 (77%)               | 264 (77%)           | 88 (75%)         | 2% (-7%; 11%)       | 0.70    |
| Diagnosis at index hospitalization                        |                         |                     |                  |                     | <0.001  |
| Acute coronary syndrome                                   | 254 (55%)               | 222 (65%)           | 32 (27%)         | 38% (28%; 47%)      | <0.001  |
| New-onset major arrhythmia                                | 75 (16%)                | 37 (11%)            | 38 (32%)         | -22% (-29%; -14%)   | <0.001  |
| Acute heart failure                                       | 115 (25%)               | 72 (21%)            | 43 (37%)         | -16% (-25%; -7%)    | 0.001   |
| Hospitalization related to adult congenital heart disease | 4 (1%)                  | 3 (1%)              | 1 (1%)           | 0%                  | 1.00    |
| Clinically suspected myocarditis                          | 11 (2%)                 | 8 (2%)              | 3 (3%)           | 0% (-3%; 3%)        | 1.00    |
| Diabetes mellitus                                         | 131 (29%)               | 80 (23%)            | 51 (44%)         | -20% (-30%; -11%)   | <0.001  |
| Current smoker                                            | 231 (50%)               | 184 (54%)           | 47 (40%)         | 14% (3%; 24%)       | 0.01    |
| Hypercholesterolemia                                      | 220 (48%)               | 171 (50%)           | 49 (42%)         | (-2%; 19%)          | 0.13    |
| Previous myocardial infarction                            | 84 (18%)                | 60 (18%)            | 24 (21%)         | -3% (-11%; 5%)      | 0.49    |
| History of malignancy                                     | 69 (15%)                | 57 (17%)            | 12 (10%)         | 6% (-1%; 14%)       | 0.10    |
| Chronic obstructive lung disease                          | 48 (10%)                | 41 (12%)            | 7 (6%)           | 6% (-0%; 12%)       | 0.08    |
| Clinically relevant valvular disease                      | 22 (5%)                 | 14 (4%)             | 8 (7%)           | -3% (-7%; 2%)       | 0.22    |
| NYHA class                                                |                         |                     |                  |                     | <0.001  |
| NYHA I                                                    | 214 (48%)               | 190 (56%)           | 24 (23%)         | 33% (22%; 43%)      | <0.001  |
| NYHA II                                                   | 77 (17%)                | 61 (18%)            | 16 (15%)         | 3% (-6%; 11%)       | 0.66    |
| NYHA III                                                  | 70 (16%)                | 55 (16%)            | 15 (14%)         | 2% (-6%; 10%)       | 0.76    |
| NYHA IV                                                   | 83 (19%)                | 34 (10%)            | 49 (47%)         | -37% (-45%; -29%)   | <0.001  |
| Cardiogenic shock (Killip 4)                              | 24 (5%)                 | 11 (3%)             | 13 (11%)         | -8% (-13%; -3%)     | 0.003   |
| Fever                                                     | 56 (12%)                | 22 (6%)             | 34 (30%)         | -24% (-30%; -17%)   | <0.001  |
| Interventions performed during index hospitalization      |                         |                     |                  |                     |         |
| Coronary procedure                                        | 247 (54%)               | 221 (65%)           | 26 (22%)         | 42% (33%; 52%)      | <0.001  |
| TAVI                                                      | 0 (0%)                  | 0 (0%)              | 0 (0%)           | 0%                  |         |

|                                                              |           |          |          |                   |        |
|--------------------------------------------------------------|-----------|----------|----------|-------------------|--------|
| Intervention for major arrhythmia                            | 35 (8%)   | 22 (6%)  | 13 (11%) | -5% (-10%; 1%)    | 0.11   |
| Transfer to Intensive Care Unit during index hospitalization | 108 (24%) | 48 (14%) | 60 (51%) | -37% (-46%; -29%) | <0.001 |

Depicted are means with standard deviations ( $\pm$ ) and counts with percentages of patients with non-missing data (%). P-values from t-tests or Fisher's tests (- or chisquare tests in case more than 2 x 2 comparisons).

NYHA: New York Heart Association; TAVI: transcatheter aortic valve index.

**Supplemental Table 4. Laboratory analyses during index hospitalization of enrolled patients excluding patients with severe aortic stenosis**

|                      | All patients<br>N=459    | Controls<br>N=342        | Cases<br>N=117          | Difference (95% CI)    | p Value |
|----------------------|--------------------------|--------------------------|-------------------------|------------------------|---------|
| <b>Timepoint 1*</b>  |                          |                          |                         |                        |         |
| Leucocytes (G/L)     | n = 448, 10.0 ± 4.8      | n = 332, 10.1 ± 4.3      | n = 116, 9.6 ± 6.2      | 0.6 (-0.5; 1.6)        | 0.29    |
| Hemoglobin (g/L)     | n = 448, 134.1 ± 23.4    | n = 332, 135.9 ± 22.7    | n = 116, 128.8 ± 24.8   | 7.1 (2.1; 12.0)        | 0.005   |
| Platelets (G/L)      | n = 447, 231.2 ± 80.3    | n = 332, 236.0 ± 80.4    | n = 115, 217.5 ± 78.8   | 18.5 (1.5; 35.5)       | 0.03    |
| hs-CRP (mg/L)        | n = 306, 52.1 ± 76.0     | n = 210, 32.7 ± 60.1     | n = 96, 94.4 ± 89.3     | -61.7 (-78.8; -44.6)   | <0.001  |
| CK (U/L)             | n = 421, 419.8 ± 896.4   | n = 324, 473.3 ± 990.1   | n = 97, 241.1 ± 418.1   | 232.2 (29.3; 435.1)    | 0.025   |
| CKMB (µg/L)          | n = 199, 67.2 ± 114.1    | n = 137, 66.7 ± 105.4    | n = 62, 68.4 ± 132.2    | -1.7 (-36.1; 32.7)     | 0.92    |
| hs-TnT (ng/L)        | n = 426, 901.8 ± 2750.4  | n = 324, 1036.3 ± 2945.2 | n = 102, 474.7 ± 1961.8 | 561.6 (-50.4; 1173.6)  | 0.07    |
| eGFR (mL/min)        | n = 436, 69.7 ± 26.1     | n = 331, 71.1 ± 25.0     | n = 105, 65.1 ± 28.9    | 6.1 (0.4; 11.8)        | 0.04    |
| <b>Timepoint 2**</b> |                          |                          |                         |                        |         |
| Leucocytes (G/L)     | n = 368, 8.7 ± 3.8       | n = 262, 8.5 ± 3.0       | n = 106, 9.4 ± 5.3      | -0.9 (-1.8; -0.1)      | 0.04    |
| Hemoglobin (g/L)     | n = 369, 122.3 ± 23.7    | n = 262, 126.2 ± 22.2    | n = 107, 12.9 ± 24.9    | 13.2 (8.0; 18.4)       | <0.001  |
| Platelets (G/L)      | n = 367, 244.9 ± 100.1   | n = 262, 240.2 ± 97.7    | n = 105, 256.6 ± 105.4  | -16.5 (-39.2; 6.2)     | 0.15    |
| hs-CRP (mg/L)        | n = 227, 39.9 ± 58.0     | n = 145, 29.8 ± 38.2     | n = 82, 57.7 ± 79.4     | -27.9 (-43.3; -12.6)   | <0.001  |
| CK (U/L)             | n = 362, 790.1 ± 2249.1  | n = 290, 761.7 ± 1299.1  | n = 72, 904.4 ± 4339.7  | -142.6 (-725.2; 439.9) | 0.63    |
| CKMB (µg/L)          | n = 225, 59.9 ± 110.1    | n = 163, 68.7 ± 118.4    | n = 62, 36.9 ± 80.7     | 31.8 (-0.3; 63.9)      | 0.05    |
| hs-TnT (ng/L)        | n = 368, 1631.6 ± 3477.2 | n = 291, 1903.1 ± 3723.3 | n = 77, 605.4 ± 2034.6  | 1297.7 (431.0; 2164.4) | 0.003   |
| eGFR (mL/min)        | n = 396, 68.3 ± 28.3     | n = 304, 69.4 ± 27.2     | n = 92, 64.7 ± 31.6     | 4.7 (-1.9; 11.3)       | 0.16    |

\* Time point closest to admission for index hospitalization

\*\* Time point closest to hospital discharge

CK: creatine kinase; eGFR: estimated glomerular filtration rate; hs-CRP: high-sensitivity C-reactive protein; hs-TnT: high-sensitivity troponin T.



**Supplemental Table 5. In-hospital clinical outcomes of enrolled patients excluding patients with severe aortic stenosis**

|                                  | Controls<br>N=342 | Cases<br>N=117 | Difference (95% CI) | p-value |
|----------------------------------|-------------------|----------------|---------------------|---------|
| Death                            | 4 (1%)            | 20 (17%)       | -16% (-20%; -11%)   | <0.001  |
| Cardiovascular death             | 2 (1%)            | 4 (3%)         | -3% (-5%; -0%)      | 0.04    |
| Non-cardiovascular death         | 2 (1%)            | 15 (13%)       | -12% (-16%; -8%)    | <0.001  |
| Unclear death                    | 0 (0%)            | 1 (1%)         | -1% (-2%; 0%)       | 0.25    |
| Myocardial infarction            | 3 (1%)            | 3 (3%)         | -2% (-4%; 1%)       | 0.18    |
| Unplanned revascularisation      | 0 (0%)            | 0 (0%)         | 0%                  |         |
| Cerebrovascular event            | 0 (0%)            | 1 (1%)         | -1% (-2%; 0%)       | 0.25    |
| Stroke (ischemic or hemorrhagic) | 0 (0%)            | 1 (1%)         | -1% (-2%; 0%)       | 0.25    |
| Acute kidney injury              | 6 (2%)            | 10 (9%)        | -7% (-11%; -3%)     | 0.002   |
| Major arrhythmia                 | 15 (4%)           | 18 (15%)       | -11% (-16%; -6%)    | <0.001  |

Depicted are counts (%).

**Supplemental Table 6. Clinical outcomes at 30 days and one year\* excluding patients with severe aortic stenosis**

|                                      | Outcomes at 30 days |                |                                             |             | Outcomes at 1 year |                |                                             |         |
|--------------------------------------|---------------------|----------------|---------------------------------------------|-------------|--------------------|----------------|---------------------------------------------|---------|
|                                      | Controls<br>N=342   | Cases<br>N=117 | Subdistribution<br>Hazard ratio (95%<br>CI) | p-<br>value | Controls<br>N=342  | Cases<br>N=117 | Subdistribution<br>Hazard ratio (95%<br>CI) | p-value |
| Death                                | 8 (2.4%) [0]        | 23 (19.8%) [0] | 9.13 (4.08-20.44)                           | <0.001      | 24 (7.7%) [0]      | 26 (29.2%) [0] | 4.31 (2.53-7.35)                            | <0.001  |
| Cardiovascular death                 | 3 (0.9%) [5]        | 5 (4.3%) [18]  | 4.93 (1.18-20.60)                           | 0.03        | 9 (2.9%) [15]      | 5 (5.5%) [21]  | 1.94 (0.68-5.53)                            | 0.21    |
| Non-cardiovascular death             | 2 (0.6%) [6]        | 17 (14.8%) [6] | 26.62 (6.16-115.04)                         | <0.001      | 9 (2.9%) [15]      | 19 (20.5%) [7] | 7.87 (3.74-16.56)                           | <0.001  |
| Unclear death                        | 3 (0.9%) [5]        | 1 (0.9%) [22]  | 0.97 (0.10-9.28)                            | 0.98        | 6 (2.0%) [18]      | 2 (2.3%) [24]  | 1.17 (0.24-5.73)                            | 0.85    |
| Myocardial infarction                | 3 (0.9%) [7]        | 3 (2.6%) [23]  | 2.95 (0.60-14.53)                           | 0.18        | 7 (2.2%) [22]      | 3 (3.3%) [26]  | 1.47 (0.40-5.43)                            | 0.56    |
| Unplanned revascularisation          | 0 (0.0%) [8]        | 0 (0.0%) [23]  |                                             |             | 0 (0.0%) [24]      | 1 (1.6%) [26]  |                                             |         |
| Cerebrovascular event                | 0 (0.0%) [8]        | 1 (0.8%) [23]  |                                             |             | 1 (0.3%) [24]      | 2 (2.5%) [26]  | 7.36 (0.70-77.17)                           | 0.10    |
| Stroke (ischemic or<br>hemorrhagic)  | 0 (0.0%) [8]        | 1 (0.8%) [23]  |                                             |             | 0 (0.0%) [24]      | 2 (2.4%) [26]  |                                             |         |
| Acute kidney injury                  | 7 (2.1%) [8]        | 9 (7.8%) [19]  | 3.88 (1.45-10.37)                           | 0.007       | 8 (2.5%) [23]      | 12 (11.4%)[22] | 4.86 (1.97-11.99)                           | <0.001  |
| Major arrhythmia                     | 16 (4.7%) [7]       | 18 (15.4%)[18] | 3.47 (1.78-6.76)                            | <0.001      | 22 (6.8%) [22]     | 22 (21.3%)[21] | 3.42 (1.90-6.17)                            | <0.001  |
| Hospitalization for heart<br>failure | 3 (0.9%) [8]        | 4 (3.5%) [23]  | 3.94 (0.88-17.60)                           | 0.07        | 17 (5.8%) [22]     | 5 (6.4%) [26]  | 1.12 (0.42-2.97)                            | 0.82    |

\* First events of each event type under competing risk with death.

Depicted are counts with the Aalen-Johansen estimator of the cumulative incidence (%) [in square brackets the number of patients with the competing event occurring before the event of interest].

Subdistribution ratio of the hazards using the Fine & Grey methodology with 95 % confidence interval (CI) and p-value comparing controls vs. cases.

**Supplemental Table 7. Baseline characteristics of enrolled SARS-COV-2-positive patients stratified by diabetic status at baseline**

|                                                           | All cases<br>N = 122 | Diabetic<br>N = 54 | Non-diabetic<br>N = 68 | Difference (95% CI) | p Value |
|-----------------------------------------------------------|----------------------|--------------------|------------------------|---------------------|---------|
| Age (years)                                               | 67.6 ± 14.8          | 71.9 ± 8.4         | 64.2 ± 17.7            | 7.7 (2.5; 12.9)     | 0.004   |
| Male sex                                                  | 92 (75%)             | 41 (76%)           | 51 (75%)               | 1% (-15%; 17%)      | 1.000   |
| Diagnosis at index hospitalization                        |                      |                    |                        |                     | 0.28    |
| Acute coronary syndrome                                   | 32 (26%)             | 14 (26%)           | 18 (26%)               | -1% (-17%; 15%)     | 1.00    |
| New-onset major arrhythmia                                | 38 (31%)             | 12 (22%)           | 26 (38%)               | -16% (-33%; 1%)     | 0.08    |
| Acute heart failure                                       | 43 (35%)             | 24 (44%)           | 19 (28%)               | 17% (-1%; 34%)      | 0.08    |
| Symptomatic severe aortic stenosis                        | 5 (4%)               | 3 (6%)             | 2 (3%)                 | 3% (-5%; 10%)       | 0.65    |
| Hospitalization related to adult congenital heart disease | 1 (1%)               | 0 (0%)             | 1 (1%)                 | -1% (-5%; 2%)       | 1.00    |
| Clinically suspected myocarditis                          | 3 (2%)               | 1 (2%)             | 2 (3%)                 | -1% (-7%; 5%)       | 1.00    |
| Diabetes mellitus                                         |                      |                    |                        |                     |         |
| Current smoker                                            | 50 (41%)             | 26 (48%)           | 24 (35%)               | 13% (-5%; 31%)      | 0.19    |
| Hypercholesterolemia                                      | 54 (44%)             | 31 (57%)           | 23 (34%)               | 24% (6%; 41%)       | 0.01    |
| Previous myocardial infarction                            | 26 (21%)             | 16 (30%)           | 10 (15%)               | 15% (0%; 30%)       | 0.08    |
| History of malignancy                                     | 13 (11%)             | 9 (17%)            | 4 (6%)                 | 11% (-0%; 22%)      | 0.08    |
| Chronic obstructive lung disease                          | 8 (7%)               | 3 (6%)             | 5 (7%)                 | -2% (-11%; 7%)      | 1.00    |
| Clinically relevant valvular disease                      | 11 (9%)              | 7 (13%)            | 4 (6%)                 | 7% (-3%; 17%)       | 0.21    |
| NYHA class                                                |                      |                    |                        |                     | 0.24    |
| NYHA I                                                    | 24 (22%)             | 7 (14%)            | 17 (29%)               | -15% (-30%; 1%)     | 0.07    |
| NYHA II                                                   | 18 (17%)             | 8 (16%)            | 10 (17%)               | -1% (-15%; 13%)     | 1.00    |
| NYHA III                                                  | 17 (16%)             | 10 (20%)           | 7 (12%)                | 8% (-6%; 22%)       | 0.29    |
| NYHA IV                                                   | 50 (46%)             | 25 (50%)           | 25 (42%)               | 8% (-11%; 27%)      | 0.45    |
| Cardiogenic shock (Killip 4)                              | 13 (11%)             | n = 54, 6 (11%)    | n = 68, 7 (10%)        | 1% (-10%; 12%)      | 1.00    |
| Fever                                                     | 34 (29%)             | 18 (35%)           | 16 (24%)               | 10% (-6%; 27%)      | 0.23    |
| Interventions performed during index hospitalization      |                      |                    |                        |                     |         |
| Coronary procedure                                        | 26 (21%)             | 10 (19%)           | 16 (24%)               | -5% (-20%; 10%)     | 0.66    |
| TAVI                                                      | 2 (2%)               | 2 (4%)             | 0 (0%)                 | 4% (-1%; 8%)        | 0.19    |

|                                                              |          |          |          |                |      |
|--------------------------------------------------------------|----------|----------|----------|----------------|------|
| Intervention for major arrhythmia                            | 13 (11%) | 5 (9%)   | 8 (12%)  | -3% (-14%; 9%) | 0.77 |
| Transfer to Intensive Care Unit during index hospitalization | 60 (49%) | 27 (50%) | 33 (49%) | 1% (-17%; 20%) | 1.00 |

Depicted are means with standard deviations ( $\pm$ ) and counts with percentages of patients with non-missing data (%). P-values from t-tests or Fisher's tests (- or chisquare tests in case more than 2 x 2 comparisons).

NYHA: New York Heart Association; TAVI: transcatheter aortic valve index.

**Supplemental Table 8. Laboratory analyses during index hospitalization of enrolled SARS-COV-2-positive patients stratified by diabetic status at baseline**

|                      | All cases<br>N = 122    | Diabetic<br>N = 54      | Non-diabetic<br>N = 68 | Difference (95% CI)     | p Value |
|----------------------|-------------------------|-------------------------|------------------------|-------------------------|---------|
| <b>Timepoint 1*</b>  |                         |                         |                        |                         |         |
| Leucocytes (G/L)     | n = 120, 9.5 ± 6.1      | n = 53, 9.1 ± 5.0       | n = 67, 9.7 ± 6.9      | -0.7 (-2.9; 1.6)        | 0.55    |
| Hemoglobin (g/L)     | n = 120, 128.7 ± 24.7   | n = 53, 122.9 ± 26.1    | n = 67, 133.3 ± 22.7   | -10.4 (-19.2; -1.6)     | 0.02    |
| Platelets (G/L)      | n = 119, 216.4 ± 78.1   | n = 53, 220.6 ± 75.4    | n = 66, 213.1 ± 80.7   | 7.5 (-21.1; 36.1)       | 0.60    |
| hs-CRP (mg/L)        | n = 97, 93.5 ± 89.3     | n = 41, 107.9 ± 88.8    | n = 56, 83.0 ± 88.9    | 24.8 (-11.3; 61.0)      | 0.18    |
| CK (U/L)             | n = 102, 251.3 ± 443.5  | n = 44, 220.0 ± 327.6   | n = 58, 275.1 ± 516.0  | -55.1 (-231.1; 121.0)   | 0.54    |
| CKMB (µg/L)          | n = 63, 67.6 ± 131.3    | n = 27, 58.5 ± 116.8    | n = 36, 74.4 ± 142.4   | -15.9 (-82.4; 50.7)     | 0.64    |
| hs-TnT (ng/L)        | n = 106, 458.7 ± 1925.8 | n = 46, 146.5 ± 226.1   | n = 60, 698.1 ± 2535.1 | -551.6 (-1294.6; 191.4) | 0.14    |
| eGFR (mL/min)        | n = 109, 64.2 ± 29.1    | n = 45, 51.5 ± 29.2     | n = 64, 73.2 ± 25.6    | -21.7 (-32.1; -11.2)    | <0.001  |
| <b>Timepoint 2**</b> |                         |                         |                        |                         |         |
| Leucocytes (G/L)     | n = 111, 9.2 ± 5.3      | n = 48, 8.5 ± 4.8       | n = 63, 9.8 ± 5.6      | -1.3 (-3.3; 0.7)        | 0.20    |
| Hemoglobin (g/L)     | n = 112, 113.3 ± 25.0   | n = 49, 109.7 ± 21.2    | n = 63, 116.2 ± 27.4   | -6.5 (-15.9; 2.9)       | 0.17    |
| Platelets (G/L)      | n = 110, 253.2 ± 104.9  | n = 48, 243.5 ± 107.8   | n = 62, 260.7 ± 102.8  | -17.2 (-57.1; 22.8)     | 0.40    |
| hs-CRP (mg/L)        | n = 85, 56.3 ± 78.4     | n = 32, 53.1 ± 76.2     | n = 53, 58.2 ± 80.3    | -5.1 (-40.0; 29.8)      | 0.77    |
| CK (U/L)             | n = 76, 884.5 ± 4227.6  | n = 35, 1326.5 ± 6172.0 | n = 41, 507.2 ± 902.5  | 819.2 (-1110.6; 2749.0) | 0.40    |
| CKMB (µg/L)          | n = 63, 36.6 ± 80.0     | n = 28, 27.9 ± 63.5     | n = 35, 43.6 ± 91.4    | -15.8 (-56.1; 24.5)     | 0.44    |
| hs-TnT (ng/L)        | n = 80, 585.1 ± 1998.3  | n = 33, 229.1 ± 470.7   | n = 47, 835.1 ± 2559.1 | -606.0 (-1499.9; 287.9) | 0.18    |
| eGFR (mL/min)        | n = 96, 63.7 ± 31.7     | n = 40, 48.6 ± 28.9     | n = 56, 74.5 ± 29.4    | -25.9 (-37.8; -13.9)    | <0.001  |

\* Time point closest to admission for index hospitalization

\*\* Time point closest to hospital discharge

CK: creatine kinase; eGFR: estimated glomerular filtration rate; hs-CRP: high-sensitivity C-reactive protein; hs-TnT: high-sensitivity troponin T.

**Supplemental Table 9. In-hospital clinical outcomes of enrolled SARS-COV-2-positive patients stratified by diabetic status at baseline**

|                                  | Diabetic<br>N = 54 | Non-diabetic<br>N = 68 | Difference (95% CI) | p-value |
|----------------------------------|--------------------|------------------------|---------------------|---------|
| Death                            | 9 (17%)            | 11 (16%)               | 0%                  | 1.00    |
| Cardiovascular death             | 1 (2%)             | 3(4%)                  | -3% (-9%; 4%)       | 0.63    |
| Non-cardiovascular death         | 7 (13%)            | 8 (12%)                | 1% (-11%; 13%)      | 1.00    |
| Unclear death                    | 1 (2%)             | 0 (0%)                 | 2% (-1%; 5%)        | 0.44    |
| Myocardial infarction            | 1(2%)              | 2 (3%)                 | -1% (-7%; 5%)       | 1.00    |
| Unplanned revascularisation      | 0 (0%)             | 0 (0%)                 | 0%                  |         |
| Cerebrovascular event            | 0 (0%)             | 1 (1%)                 | -1% (-5%; 2%)       | 1.00    |
| Stroke (ischemic or hemorrhagic) | 0 (0%)             | 1 (1%)                 | -1% (-5%; 2%)       | 1.00    |
| Acute kidney injury              | 7 (13%)            | 3 (4%)                 | 9% (-1%; 18%)       | 0.11    |
| Major arrhythmia                 | 7 (13%)            | 11 (16%)               | -3% (-16%; 10%)     | 0.80    |

Depicted are counts (%).

**Supplemental Table 10. Clinical outcomes at 30 days and one year\* of enrolled SARS-COV-2-positive patients stratified by diabetic status at baseline**

|                                      | Outcomes at 30 days |                        |                                             |             | Outcomes at 1 year |                        |                                             |         |
|--------------------------------------|---------------------|------------------------|---------------------------------------------|-------------|--------------------|------------------------|---------------------------------------------|---------|
|                                      | Diabetic<br>N = 54  | Non-diabetic<br>N = 68 | Subdistribution<br>Hazard ratio (95%<br>CI) | p-<br>value | Diabetic<br>N = 54 | Non-diabetic<br>N = 68 | Subdistribution<br>Hazard ratio (95%<br>CI) | p-value |
| Death                                | 12 (22.1%) [0]      | 11 (16.6%) [0]         | 1.37 (0.61-3.09)                            | 0.45        | 14 (27.3%) [0]     | 12 (19.4%) [0]         | 1.48 (0.69-3.17)                            | 0.32    |
| Cardiovascular death                 | 2 (3.7%) [10]       | 3 (4.5%) [8]           | 0.84 (0.14-4.99)                            | 0.84        | 2 (3.7%) [12]      | 3 (4.5%) [9]           | 0.84 (0.14-4.99)                            | 0.84    |
| Non-cardiovascular death             | 9 (16.6%) [3]       | 8 (12.1%) [3]          | 1.41 (0.55-3.63)                            | 0.48        | 10 (19.6%) [4]     | 9 (14.5%) [3]          | 1.40 (0.57-3.41)                            | 0.46    |
| Unclear death                        | 1 (1.9%) [11]       | 0 (0.0%) [11]          |                                             |             | 2 (4.6%) [12]      | 0 (0.0%) [12]          |                                             |         |
| Myocardial infarction                | 1 (1.9%) [12]       | 2 (2.9%) [11]          | 0.63 (0.06-6.92)                            | 0.70        | 1 (1.9%) [14]      | 2 (2.9%) [12]          | 0.63 (0.06-6.92)                            | 0.70    |
| Unplanned revascularisation          | 0 (0.0%) [12]       | 0 (0.0%) [11]          |                                             |             | 0 (0.0%) [14]      | 1 (2.9%) [12]          |                                             |         |
| Cerebrovascular event                | 0 (0.0%) [12]       | 1 (1.5%) [11]          |                                             |             | 1 (2.7%) [14]      | 1 (2.1%) [12]          | 1.25 (0.08-19.52)                           | 0.87    |
| Stroke (ischemic or<br>hemorrhagic)  | 0 (0.0%) [12]       | 1 (1.5%) [11]          |                                             |             | 1 (2.7%) [14]      | 1 (2.1%) [12]          | 1.25 (0.08-19.52)                           | 0.87    |
| Acute kidney injury                  | 6 (11.0%) [10]      | 3 (4.4%) [9]           | 2.57 (0.65-10.16)                           | 0.18        | 9 (19.0%) [12]     | 3 (5.2%) [10]          | 3.93 (1.06-14.53)                           | 0.04    |
| Major arrhythmia                     | 7 (12.9%) [11]      | 11 (16.1%) [7]         | 0.79 (0.31-2.02)                            | 0.62        | 8 (17.6%) [13]     | 14 (23.9%) [8]         | 0.71 (0.30-1.67)                            | 0.43    |
| Hospitalization for heart<br>failure | 2 (3.8%) [12]       | 2 (3.0%) [11]          | 1.24 (0.18-8.79)                            | 0.83        | 2 (4.9%) [14]      | 3 (5.5%) [12]          | 0.88 (0.15-5.09)                            | 0.89    |

\* First events of each event type under competing risk with death.

Depicted are counts with the Aalen-Johansen estimator of the cumulative incidence (%) [in square brackets the number of patients with the competing event occurring before the event of interest].

**Supplemental Table 11. Baseline characteristics of enrolled SARS-COV-2-positive patients in relation to Intensive Care Unit transfer or not during index hospitalization**

|                                                           | All cases<br>N = 122 | No ICU transfer<br>N = 62 | ICU transfer<br>N = 60 | Difference (95% CI) | p Value |
|-----------------------------------------------------------|----------------------|---------------------------|------------------------|---------------------|---------|
| Age (years)                                               | 67.6 ± 14.8          | 65.9 ± 15.7               | 69.4 ± 13.7            | -3.6 (-8.9; 1.7)    | 0.12    |
| Male sex                                                  | 92 (75%)             | 50 (81%)                  | 42 (70%)               | 11% (-5%; 26%)      | 0.21    |
| Diagnosis at index hospitalization                        |                      |                           |                        |                     | 0.14    |
| Acute coronary syndrome                                   | 32 (26%)             | 14 (23%)                  | 18 (30%)               | -7% (-23%; 8%)      | 0.41    |
| New-onset major arrhythmia                                | 38 (31%)             | 22 (35%)                  | 16 (27%)               | 9% (-8%; 25%)       | 0.33    |
| Acute heart failure                                       | 43 (35%)             | 19 (31%)                  | 24 (40%)               | -9% (-27%; 8%)      | 0.34    |
| Symptomatic severe aortic stenosis                        | 5 (4%)               | 5 (8%)                    | 0 (0%)                 | 8% (1%; 15%)        | 0.06    |
| Hospitalization related to adult congenital heart disease | 1 (1%)               | 1 (2%)                    | 0 (0%)                 | 2% (-2%; 5%)        | 1.00    |
| Clinically suspected myocarditis                          | 3 (2%)               | 1 (2%)                    | 2 (3%)                 | -2% (-7%; 4%)       | 0.62    |
| Diabetes mellitus                                         | 54 (44%)             | 27 (44%)                  | 27 (45%)               | -1% (-19%; 17%)     | 1.00    |
| Current smoker                                            | 50 (41%)             | 22 (35%)                  | 28 (47%)               | -11% (-29%; 6%)     | 0.27    |
| Hypercholesterolemia                                      | 54 (44%)             | 32 (52%)                  | 22 (37%)               | 15% (-3%; 33%)      | 0.10    |
| Previous myocardial infarction                            | 26 (21%)             | 15 (24%)                  | 11 (18%)               | 6% (-9%; 21%)       | 0.51    |
| History of malignancy                                     | 13 (11%)             | 6 (10%)                   | 7 (12%)                | -2% (-13%; 9%)      | 0.78    |
| Chronic obstructive lung disease                          | 8 (7%)               | 5 (8%)                    | 3 (5%)                 | 3% (-6%; 12%)       | 0.72    |
| Clinically relevant valvular disease                      | 11 (9%)              | 8 (13%)                   | 3 (5%)                 | 8% (-2%; 18%)       | 0.20    |
| NYHA class                                                |                      |                           |                        |                     | 0.24    |
| NYHA I                                                    | 24 (22%)             | 15 (27%)                  | 9 (17%)                | 10% (-6%; 26%)      | 0.25    |
| NYHA II                                                   | 18 (17%)             | 15 (27%)                  | 3 (6%)                 | 21% (7%; 35%)       | 0.004   |
| NYHA III                                                  | 17 (16%)             | 10 (18%)                  | 7 (13%)                | 5% (-9%; 19%)       | 0.60    |
| NYHA IV                                                   | 50 (46%)             | 16 (29%)                  | 34 (64%)               | -36% (-53%; -18%)   | <0.001  |
| Fever                                                     | 34 (29%)             | 15 (24%)                  | 19 (34%)               | -10% (-26%; 7%)     | 0.31    |
| Interventions performed during index hospitalization      |                      |                           |                        |                     |         |
| Coronary procedure                                        | 26 (21%)             | 0 (16%)                   | 16 (27%)               | -11% (-25%; 4%)     | 0.19    |



|      |        |        |        |              |      |
|------|--------|--------|--------|--------------|------|
| TAVI | 2 (2%) | 2 (3%) | 0 (0%) | 3% (-1%; 8%) | 0.49 |
|------|--------|--------|--------|--------------|------|

Depicted are means with standard deviations ( $\pm$ ) and counts with percentages of patients with non-missing data (%). P-values from t-tests or Fisher's tests (- or chisquare tests in case more than 2 x 2 comparisons).

NYHA: New York Heart Association; TAVI: transcatheter aortic valve index.

**Supplemental Table 12. Laboratory analyses during index hospitalization of enrolled SARS-COV-2-positive patients in relation to Intensive Care Unit transfer or not during index hospitalization**

|                      | All cases<br>N = 122 | No ICU transfer<br>N = 62 | ICU transfer<br>N = 60 | Difference (95% CI)      | p Value |
|----------------------|----------------------|---------------------------|------------------------|--------------------------|---------|
| <b>Timepoint 1*</b>  |                      |                           |                        |                          |         |
| Leucocytes (G/L)     | 9.5 ± 6.1            | 8.5 ± 4.9                 | 10.4 ± 7.0             | -2.0 (-4.2; 0.2)         | 0.07    |
| Hemoglobin (g/L)     | 128.7 ± 24.7         | 128.1 ± 28.7              | 129.3 ± 20.1           | -1.2 (-10.2; 7.7)        | 0.79    |
| Platelets (G/L)      | 216.4 ± 78.1         | 204.2 ± 72.7              | 228.5 ± 82.0           | -24.3 (-52.5; 3.8)       | 0.09    |
| hs-CRP (mg/L)        | 93.5 ± 89.3          | 64.1 ± 72.5               | 121.2 ± 95.2           | -57.0 (-91.2; -22.8)     | 0.001   |
| CK (U/L)             | 251.3 ± 443.5        | 287.6 ± 528.1             | 222.7 ± 365.7          | 64.9 (-110.6; 240.3)     | 0.47    |
| CKMB (µg/L)          | 67.6 ± 131.3         | 85.2 ± 132.2              | 60.0 ± 131.7           | 25.2 (-46.4; 96.8)       | 0.49    |
| hs-TnT (ng/L)        | 458.7 ± 1925.8       | 337.3 ± 1036.1            | 555.4 ± 2416.8         | -218.0 (-965.8; 529.7)   | 0.56    |
| eGFR (mL/min)        | 64.2 ± 29.1          | 67.3 ± 30.2               | 61.1 ± 27.8            | 6.3 (-4.8; 17.3)         | 0.26    |
| <b>Timepoint 2**</b> |                      |                           |                        |                          |         |
| Leucocytes (G/L)     | 9.2 ± 5.3            | 7.7 ± 3.9                 | 10.6 ± 6.0             | -2.9 (-4.8; -1.0)        | 0.003   |
| Hemoglobin (g/L)     | 113.3 ± 25.0         | 122.6 ± 25.9              | 104.7 ± 20.8           | 17.9 (9.1; 26.6)         | <0.001  |
| Platelets (G/L)      | 253.2 ± 104.9        | 231.6 ± 95.5              | 272.5 ± 109.9          | -40.9 (-80.0; -1.8)      | 0.04    |
| hs-CRP (mg/L)        | 56.3 ± 78.4          | 38.4 ± 57.5               | 70.0 ± 89.4            | -31.5 (-65.0; 1.9)       | 0.06    |
| CK (U/L)             | 884.5 ± 4227.6       | 356.4 ± 565.7             | 1143.4 ± 5142.7        | -786.9 (-2836.0; 1262.1) | 0.45    |
| CKMB (µg/L)          | 36.6 ± 80.0          | 35.8 ± 73.3               | 36.9 ± 82.9            | -1.1 (-47.3; 45.1)       | 0.96    |
| hs-TnT (ng/L)        | 585.1 ± 1998.3       | 647.0 ± 1806.3            | 551.8 ± 2110.7         | 95.2 (-837.8; 1028.1)    | 0.84    |
| eGFR (mL/min)        | 63.7 ± 31.7          | 70.2 ± 30.2               | 58.1 ± 32.2            | 12.1 (-0.6; 24.8)        | 0.06    |

\* Time point closest to admission for index hospitalization

\*\* Time point closest to hospital discharge

CK: creatine kinase; eGFR: estimated glomerular filtration rate; hs-CRP: high-sensitivity C-reactive protein; hs-TnT: high-sensitivity troponin T.
